# Supplementary material for: Bacillus Subtilis Spores as Delivery System for Nasal Plasmodium Falciparum Circumsporozoite Surface Protein Immunization in a Murine Model
Source: Research Square preprint supplement (doi:10.21203/rs.3.rs-777937/v1), 2021-08-18
Supplement: Supplementary file 1 [file 9addcaeb32f5e14dc6ceac82.pdf]

Supplementary data

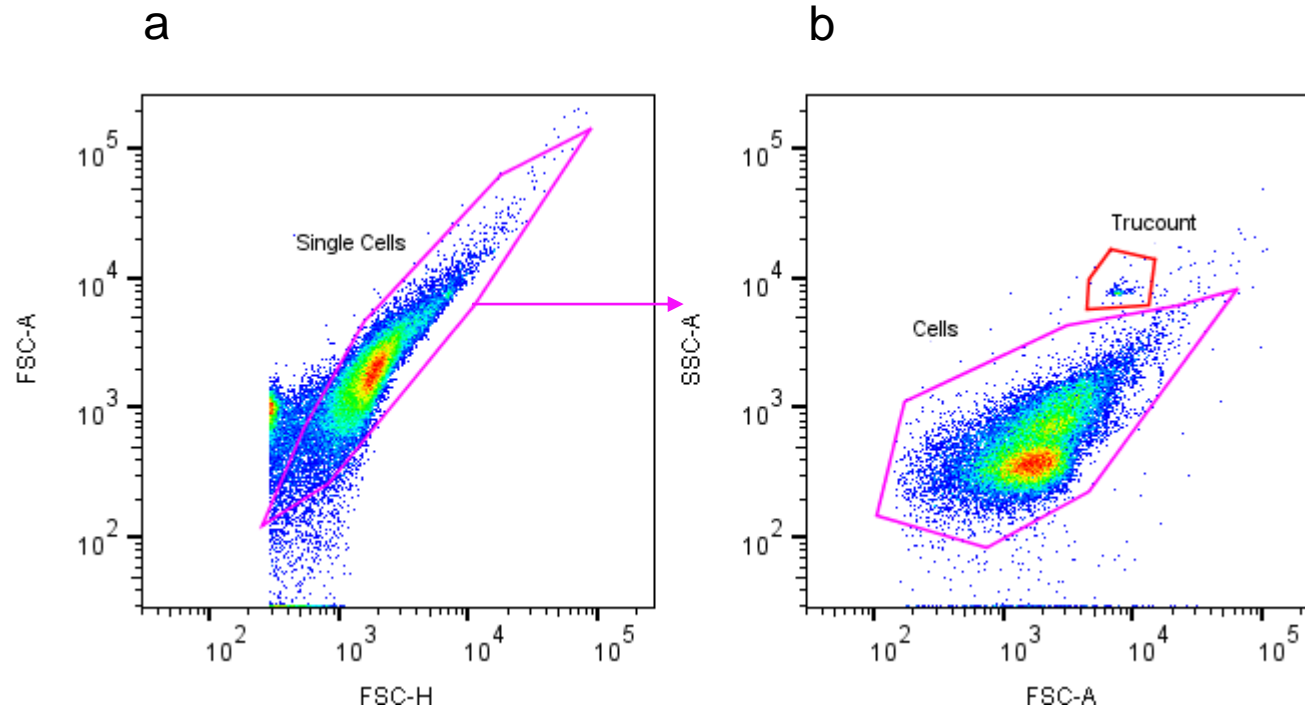

Supplementary Figure 1. Flow cytometry *Bacillus subtilis* spore quantification. (a) Determination of single cells , (b) cells of *Bacillus subtilis* gates

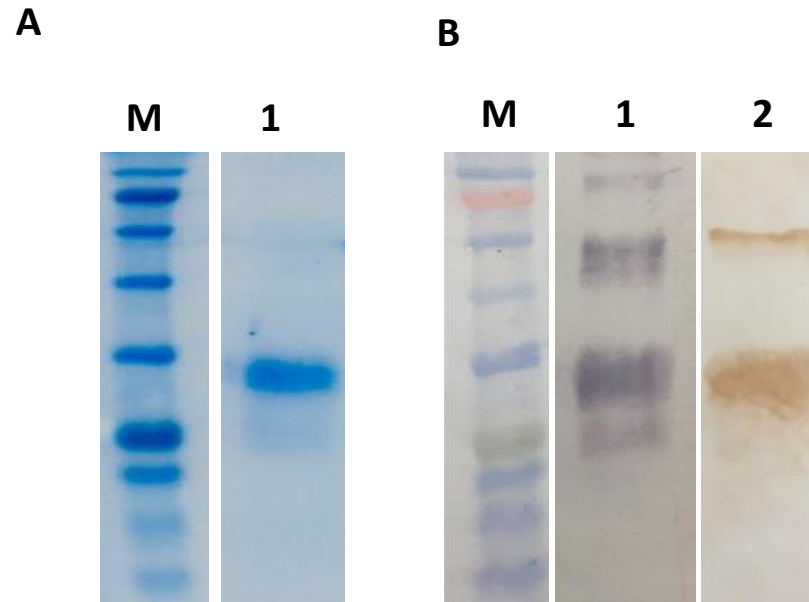

Supplementary Figure 2. Complete SDS-PAGE (A) and Western blot (B) described in Figure 1 of article main document.

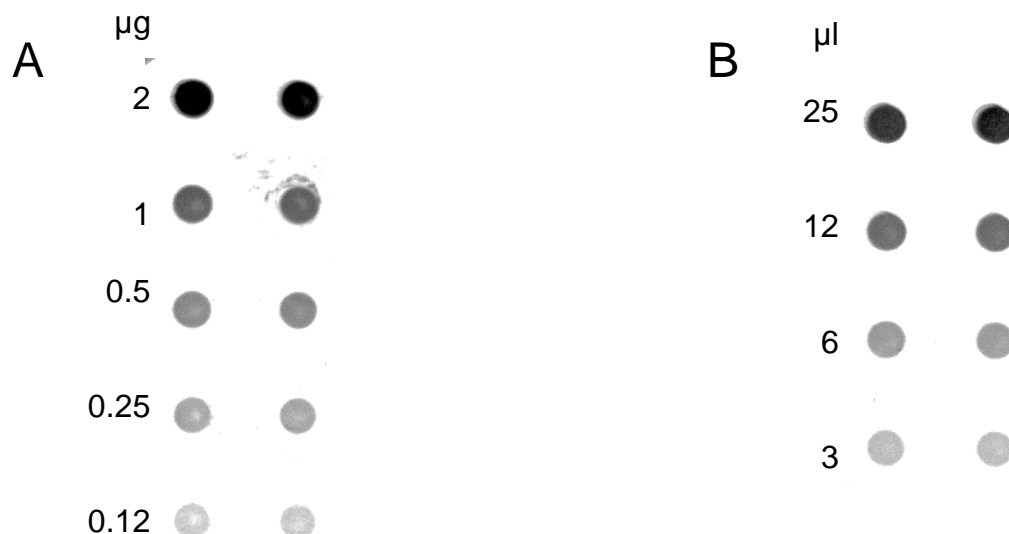

C

| # | Label | Vol. (Int.) | Local Bg. Corr. Vol. | Area  | Rf    | Density |
|---|-------|-------------|----------------------|-------|-------|---------|
| 1 | 25 µl | 91,367,068  | 34,555,918           | 2,160 | 0.056 | 42,299  |
| 2 | 12 µl | 72,266,918  | 24,694,261           | 1,932 | 0.297 | 37,405  |
| 3 | 6 µl  | 58,793,936  | 13,760,604           | 1,932 | 0.419 | 30,431  |
| 4 | 3 µl  | 35,779,565  | 4,648,407            | 1,302 | 0.611 | 27,480  |

| # | Local Bg. Corr. Den. | % band purity | % lane purity | Rolling Bg. Corr. Vol. | Rel. Quant. (w/ RB corr. vol) |
|---|----------------------|---------------|---------------|------------------------|-------------------------------|
| 1 | 15,998               | 39.336        | 0.001         | 40,440,320             | 0.869                         |
| 2 | 12,781               | 28.336        | 0.001         | 29,131,776             | 0.626                         |
| 3 | 7,122,466            | 15.913        | NA            | 16,359,680             | 0.352                         |
| 4 | 3,570,206            | 7.201         | NA            | 7,403,264              | 0.159                         |

Supplementary Figure 3. Dot blot analysis. A- Standard protein curve; B- Supernatant of coupling method; C- iBright analysis software results.

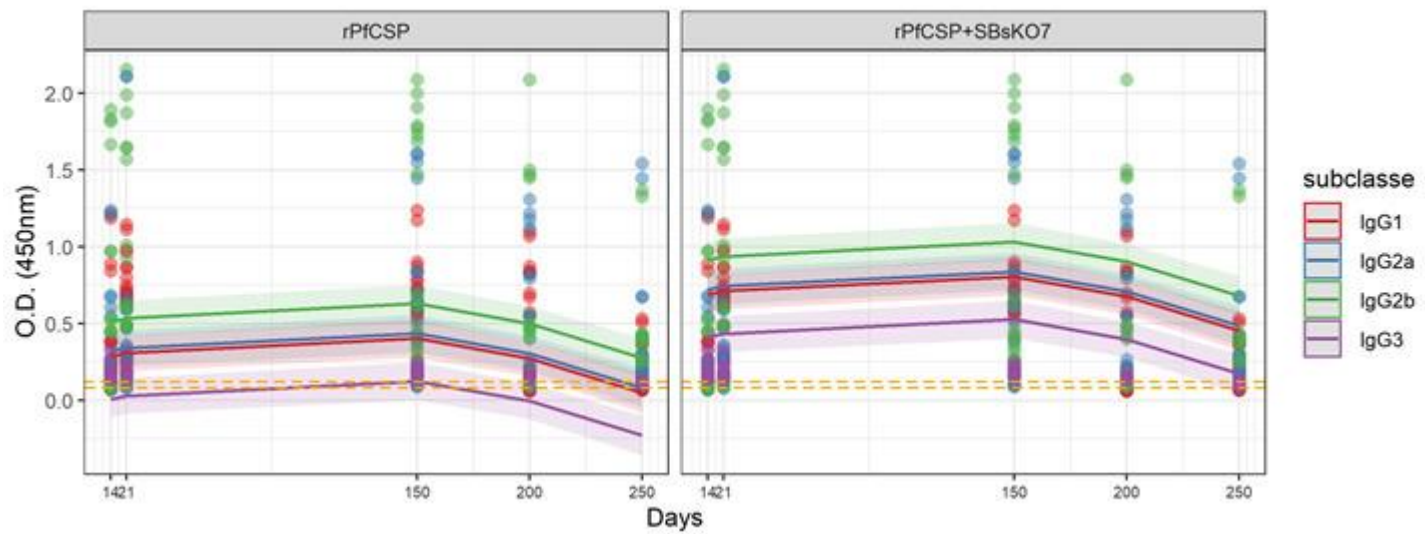

Supplementary Figure 4. Analysis of subclasses by animal groups.
